# Supplementary material for: Crecimiento y bienestar fetales
Source: Royal Society of Chemistry journal article supplement (doi:10.1039/c9nr08947k), 2004-01-01
Supplement: c9nr08947k1.pdf [file c9nr08947k1.pdf]

## Pt decorated POMOFs-derived constructions for efficient electrocatalytic hydrogen evolution

Wei Jia<sup>a,\*</sup>, Juanli Zhang<sup>a</sup>, Zhenjiang Lu<sup>a</sup>, Shiqiang Wang<sup>a</sup>, Shizhan Feng<sup>a</sup>

<sup>a</sup>Key Laboratory of Energy Materials Chemistry, Ministry of Education; Key Laboratory of Advanced Functional Materials, Autonomous Region; Institute of Applied Chemistry, Xinjiang University, Urumqi, Xinjiang 830046, P.R. China

### Experimental Section

**Chemicals:** Hydrochloroplatinic acid ( $\text{H}_2\text{PtCl}_6$ ) and copper (II) acetate monohydrate ( $(\text{CH}_3\text{COO})_2\text{Cu}\cdot\text{H}_2\text{O}$ ) were purchased from Sinopharm Chemical Reagent Co. Ltd. 12-molybdophosphoric acid hydrate ( $\text{H}_7(\text{P}(\text{Mo}_2\text{O}_7)_6\cdot x\text{H}_2\text{O})$ ), L-glutamic acid ( $\text{C}_5\text{H}_9\text{NO}_4$ ), 1,3-propanediol ( $\text{C}_3\text{H}_8\text{O}_2$ ), and 1,3,5-benzenetricarboxylic acid ( $\text{C}_9\text{H}_6\text{O}_6$ ) were purchased from Alfa Aesar. All the chemicals were used as received without further purification.

**Synthesis of NENU-5 nano-octahedrons:** In a typical synthesis, 182 mg of copper(II) acetate monohydrate, 90.8 mg of L-glutamic acid, and 300 mg of 12-molybdophosphoric acid hydrate were dissolved in 30 mL of deionized water and stirred for 20 min at room temperature. Then 122 mg of 1,3,5-benzenetricarboxylic acid dissolved in 30 ml of ethanol was poured into the above solution under continuous stirring. The solution immediately turns turbid due to the rapid formation of NENU-5 nanocrystals. After stirring for overnight at ambient condition, the green precipitates were collected by centrifugation and washed three times with ethanol. The products were dried at 60 °C for 12 h.

**Synthesis of porous  $\text{Mo}_2\text{C}$  nano-octahedrons:** The NENU-5 nano-octahedrons were heated in a tube furnace in Ar flow with a ramp rate of 5 °C min<sup>-1</sup>, maintained at 800 °C for 6 h and then cooled down naturally. The as-prepared sample was denoted as Cu/ $\text{Mo}_2\text{C}$ . The Cu nanoparticles were removed by dispersing in 0.1 M  $\text{FeCl}_3$  aqueous solution at ambient condition for 5 h. The resulting porous  $\text{Mo}_2\text{C}$  nano-octahedrons were collected by centrifugation, washed with deionized water repeatedly and then dried at 60 °C overnight.

---

\*Corresponding author.

E-mail address: jia3816892@163.com (W. Jia)

**Synthesis of Pt-Cu/Mo<sub>2</sub>C:** In a typical synthesis, 50 mg of the as-prepared Cu/Mo<sub>2</sub>C sample, different amounts of H<sub>2</sub>PtCl<sub>6</sub> and 6 mL of 1,3-propanediol were added into 30 mL airtight vial, then the mixture was ultrasonicated for 30 minutes. Subsequently, the resulting homogeneous mixture was heated at 165 °C for 10 h in an oil bath. Then it was cooled to room temperature, collecting products by centrifugation and washing three times with ethanol/acetone mixture. The sample is denoted as Pt-Cu/Mo<sub>2</sub>C-X, where X (=100, 300, 500, 700, 900) represents the adding amount of H<sub>2</sub>PtCl<sub>6</sub> (μL, 0.1 g mL<sup>-1</sup>), and Pt-Cu/Mo<sub>2</sub>C is referred to Pt-Cu/Mo<sub>2</sub>C-500.

**Synthesis of Pt/Mo<sub>2</sub>C:** 50 mg of the as-prepared Mo<sub>2</sub>C sample and 500 μL of H<sub>2</sub>PtCl<sub>6</sub> (0.1 g mL<sup>-1</sup>) were added into 6 mL of 1,3-propanediol in 30 mL airtight vial, then ultrasonically treated for 30 minutes. Subsequently, the resulting homogeneous mixture was heated at 165 °C for 10 h in an oil bath. Then it was cooled to room temperature, collecting products by centrifugation and washing three times with ethanol/acetone mixture.

### **Characterizations**

The morphologies and structures of the as-prepared samples were observed by transmission electron microscopy (TEM, JEM-2100F, Japan) and scanning electron microscopy (SEM, S-4800, Japan) equipped with energy dispersive X-ray spectroscopy (EDX). X-ray diffraction (XRD) measurements were performed on a D8 Bruker diffractometer with Cu Kα (λ=1.5418 Å) radiation to determine the crystallite structures. X-ray photoelectron spectroscopy (XPS) measurements were carried out using an ESCALAB 250Xi electron spectrometer (Thermo Fisher Scientific) with Al Kα radiation. N<sub>2</sub> adsorption-desorption was measured with Micromeritics ASAP 2020M to obtain the surface area and pore size distributions. The Pt loading amount of catalysts was determined by Agilent 5110 inductively coupled plasma optical emission spectroscopy (ICP-OES).

### **Electrochemical measurements**

Hydrogen evolution reaction (HER) measurements were performed on WaveDrive 20 (PINE Research Instrumentation) at room temperature using a standard three-electrode system with Ag/AgCl (3 M KCl) as reference electrode, graphite rod as counter electrode, and catalyst-modified glassy-carbon rotating disk electrode (RDE)

as working electrode. The Ag/AgCl electrode was calibrated with respect to a reversible hydrogen electrode (RHE,  $E_{\text{(RHE)}} = E_{\text{(Ag/AgCl)}} + 0.059\text{pH}$ ). 5.0 mg of catalyst and 20  $\mu\text{L}$  of 5 wt% Nafion solution were dispersed in 980  $\mu\text{L}$  of water/isopropanol mixture (3:1, v/v) with sonication for about 1 h to form homogeneous ink. Then 10  $\mu\text{L}$  of the ink was loaded onto a RDE of 5 mm in diameter (loading  $\sim 0.255 \text{ mg cm}^{-2}$ ) and dried at ambient temperature. The HER test was carried out in  $\text{N}_2$ -saturated 0.5 M  $\text{H}_2\text{SO}_4$  solution. Linear sweep voltammetry (LSV) was conducted at a scan rate of  $5 \text{ mV s}^{-1}$ . The durability test was carried out by taking continuous potential cycling in the range of -0.1 to 0.2 V (versus RHE) at a scan rate of  $100 \text{ mV s}^{-1}$ . After potential cycling, the LSV curves were recorded at a scan rate of  $5 \text{ mV s}^{-1}$ . Electrochemical impedance spectroscopy (EIS) measurements were performed in 0.5 M  $\text{H}_2\text{SO}_4$  over the frequency ranging from 100 kHz to 0.1 Hz with an amplitude of 5 mV at the open-circuit voltage. To estimate the electrochemical surface area (ECSA) of the catalysts, cyclic voltammetry (CV) measurements were conducted in the potential range of 0 to 1.4 V vs. RHE in 0.5 M  $\text{H}_2\text{SO}_4$  solution at a scan rate of  $50 \text{ mV s}^{-1}$ . The ECSA was obtained by integrating the H-desorption region of Pt species and dividing the resulting coulombic charge by  $210 \text{ C cm}_{\text{Pt}}^{-2}$ .

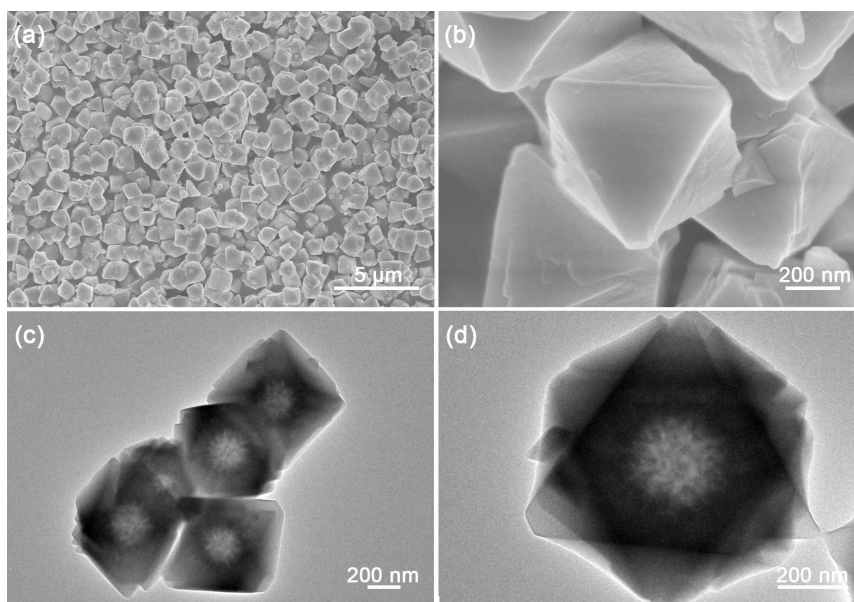

**Fig. S1** (a-b) SEM images and (c-d) TEM images of NENU-5.

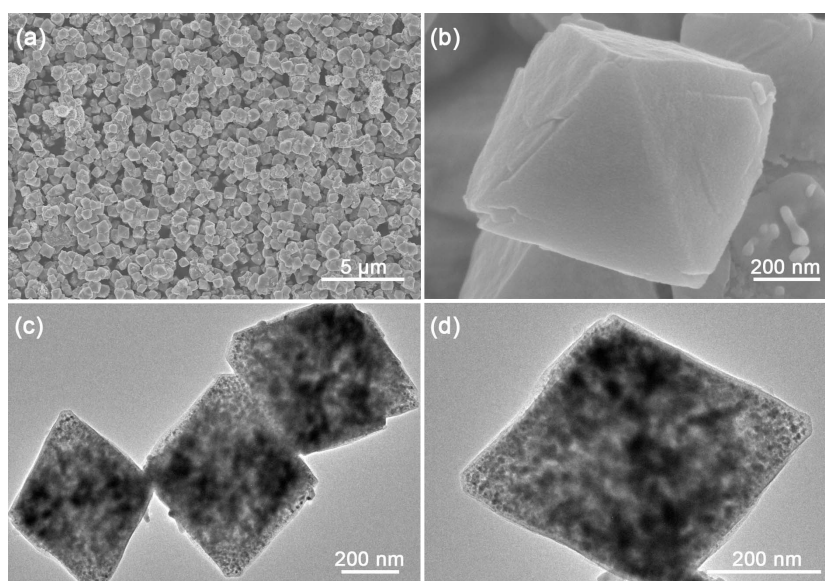

**Fig. S2** (a-b) SEM images and (c-d) TEM images of Cu/Mo<sub>2</sub>C.

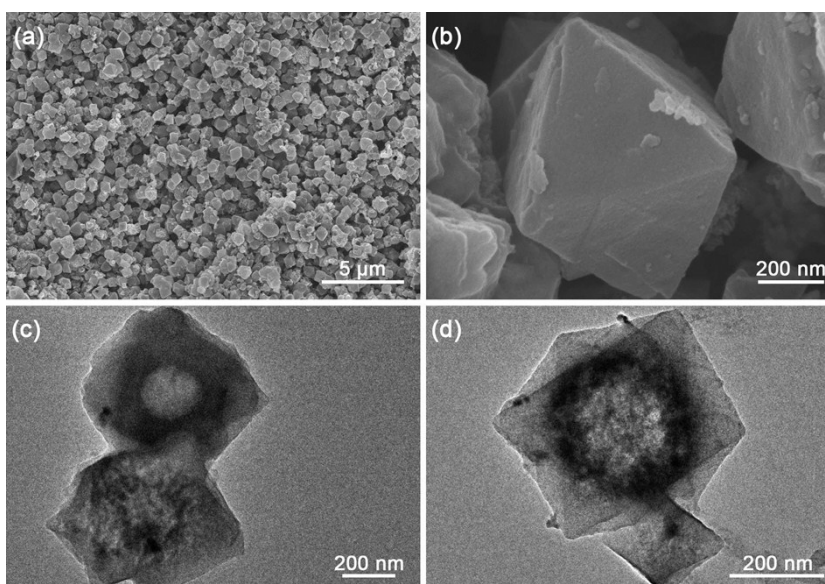

**Fig. S3** (a-b) SEM images and (c-d) TEM images of Mo<sub>2</sub>C.

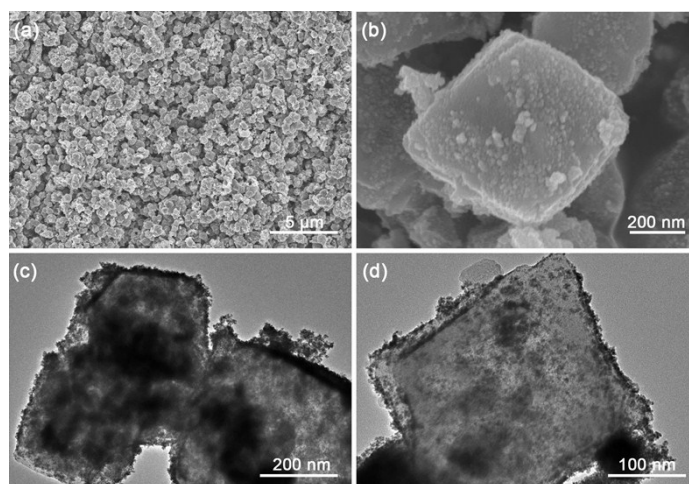

**Fig. S4** (a-b) SEM images and (c-d) TEM images of Pt/Mo<sub>2</sub>C.

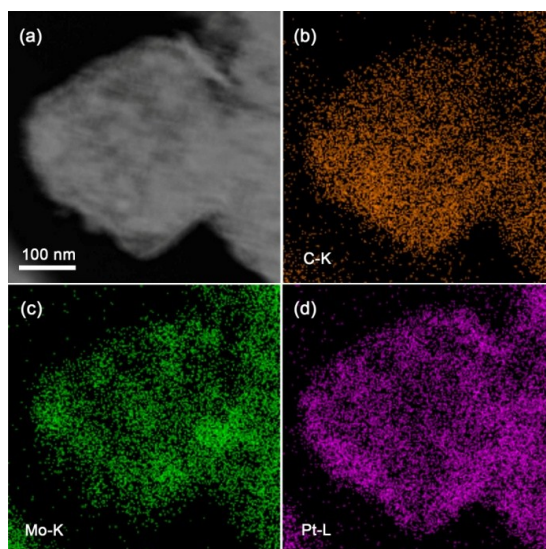

**Fig. S5** HAADF-STEM elemental mapping of an individual Pt/Mo<sub>2</sub>C nanostructure.

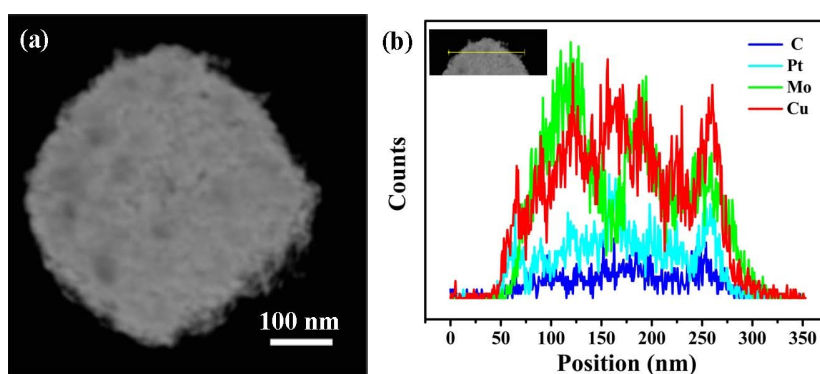

**Fig. S6** (a) HAADF-STEM image and (b) line scanning profiles across a single Pt-Cu/Mo<sub>2</sub>C nanostructure.

**Table S1** Element contents (wt %) of different samples determined by ICP-OES.

| Samples                  | Mo    | Pt    | Cu     |
|--------------------------|-------|-------|--------|
| Mo <sub>2</sub> C        | 58.60 | 0     | 0.1532 |
| Pt/ Mo <sub>2</sub> C    | 45.38 | 24.42 | 0.1734 |
| Pt-Cu/ Mo <sub>2</sub> C | 34.46 | 27.08 | 19.39  |

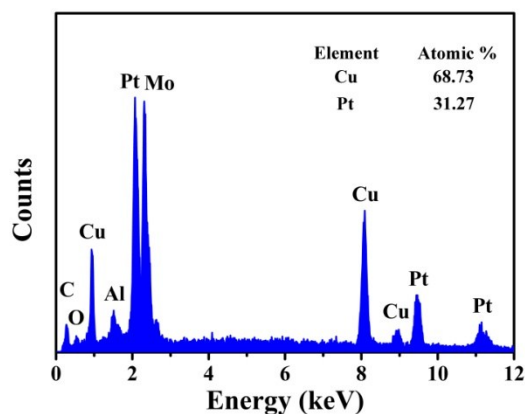**Fig. S7** EDX spectrum of Pt-Cu/Mo<sub>2</sub>C.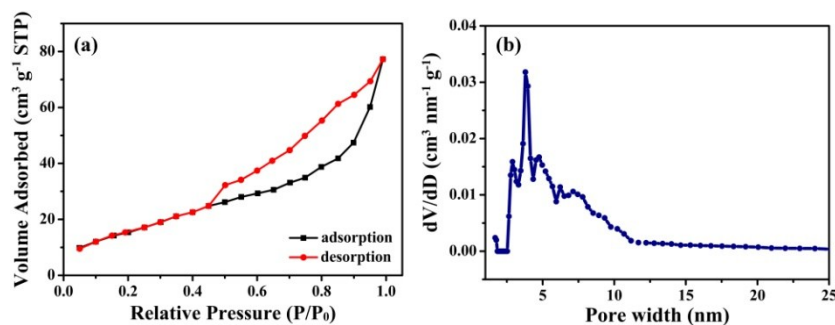**Fig. S8** (a) N<sub>2</sub> adsorption/desorption isotherms and (b) pore size distributions of Cu/Mo<sub>2</sub>C.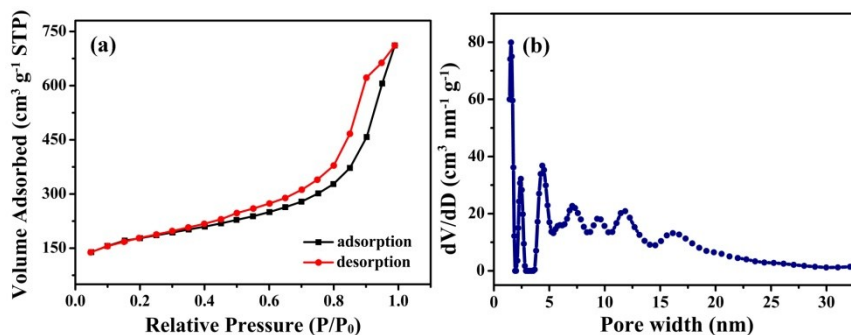**Fig. S9** (a) N<sub>2</sub> adsorption/desorption isotherms and (b) pore size distributions of Mo<sub>2</sub>C.

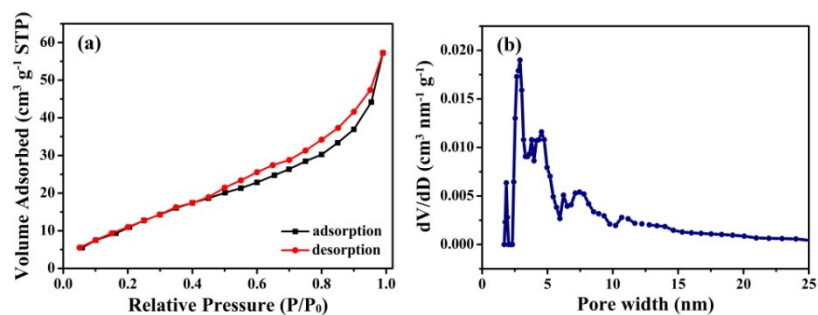

**Fig. S10** (a) N<sub>2</sub> adsorption/desorption isotherms and (b) pore size distributions of Pt/Mo<sub>2</sub>C.

**Table S2** Comparisons of BET surface areas and average pore widths for the as-prepared catalysts.

|                                                    | Mo <sub>2</sub> C | Cu/Mo <sub>2</sub> C | Pt/Mo <sub>2</sub> C | Pt-Cu/Mo <sub>2</sub> C |
|----------------------------------------------------|-------------------|----------------------|----------------------|-------------------------|
| BET surface area (m <sup>2</sup> g <sup>-1</sup> ) | 132.5             | 108.8                | 78.6                 | 91.1                    |
| Average pore width (nm)                            | 6.6               | 3.8                  | 2.9                  | 5.3                     |

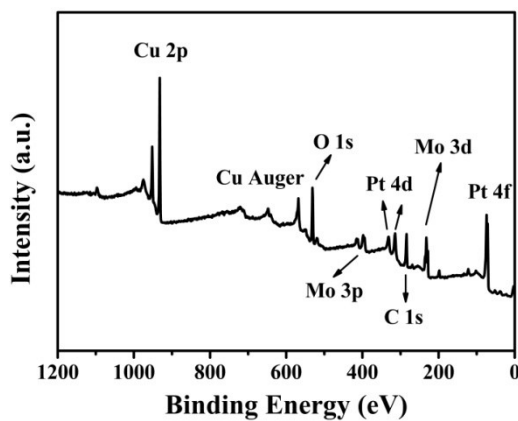

**Fig. S11** XPS survey spectrum of Pt-Cu/Mo<sub>2</sub>C.

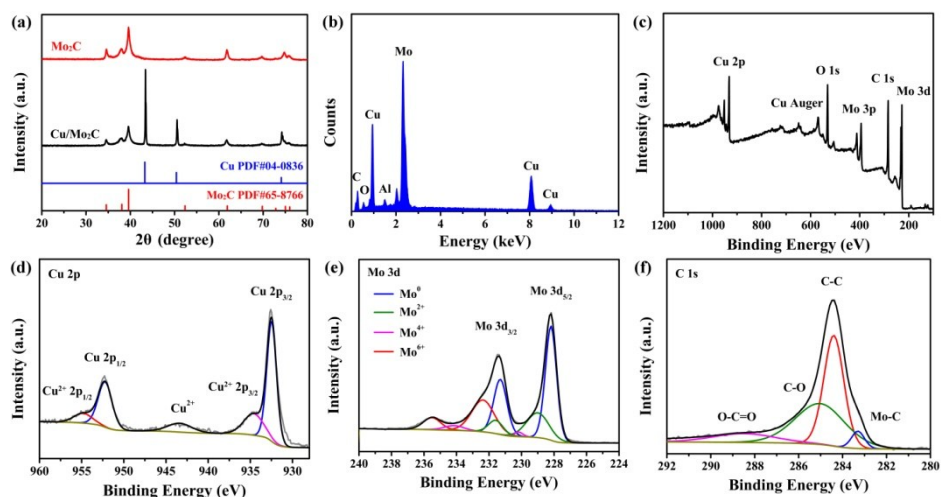

**Fig. S12** (a) XRD patterns of  $\text{Mo}_2\text{C}$  and  $\text{Cu}/\text{Mo}_2\text{C}$ , (b) EDX spectrum, XPS spectra of (c) full survey spectrum, (d) Cu 2p, (e) Mo 3d, and (f) C 1s of  $\text{Cu}/\text{Mo}_2\text{C}$ .

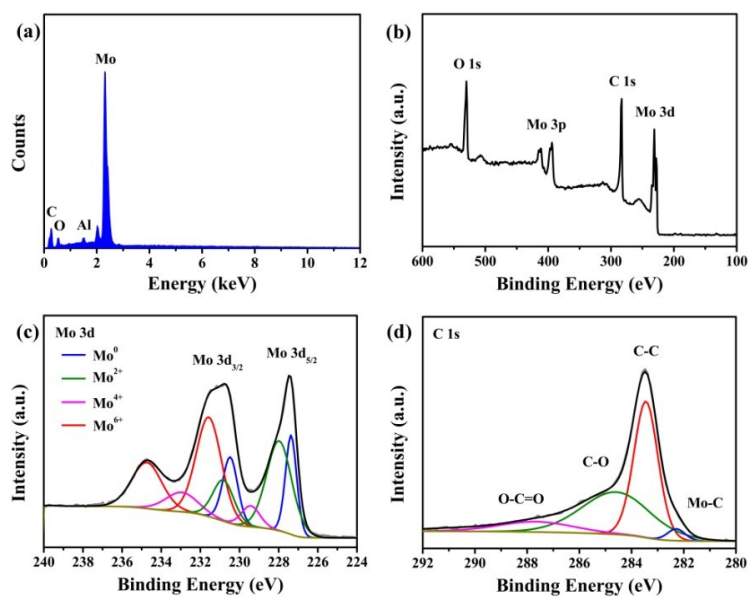

**Fig. S13** (a) EDX spectrum, XPS spectra of (b) full survey spectrum, (c) Mo 3d, and (d) C 1s for  $\text{Mo}_2\text{C}$ .



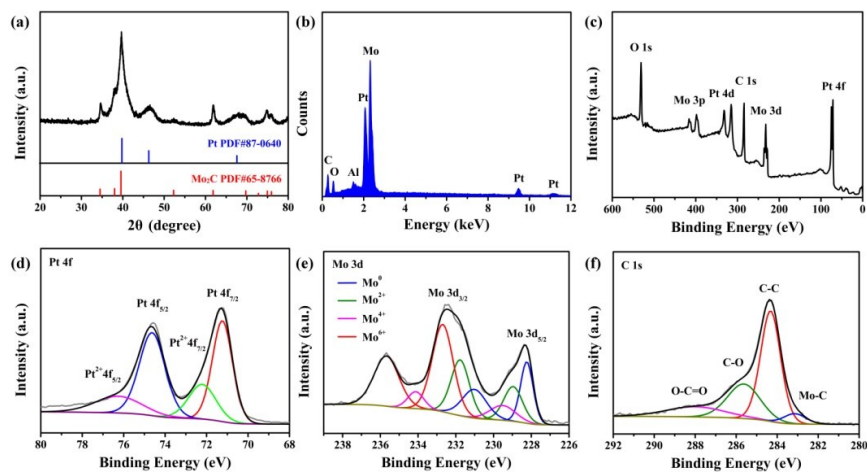

**Fig. S14** (a) XRD pattern, (b) EDX spectrum, XPS spectra of (c) full survey spectrum, (d) Pt 4f, (e) Mo 3d, and (f) C 1s for Pt/Mo<sub>2</sub>C.

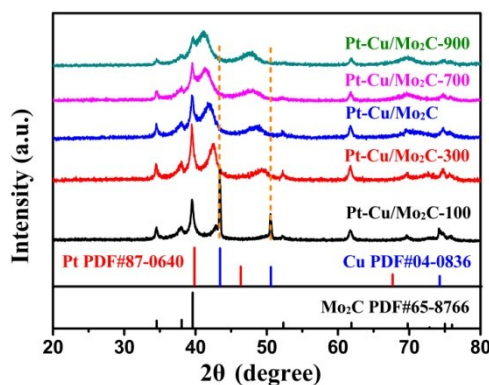

**Fig. S15** XRD patterns of the samples with different Cu/Pt atomic ratios of Pt-Cu/Mo<sub>2</sub>C.

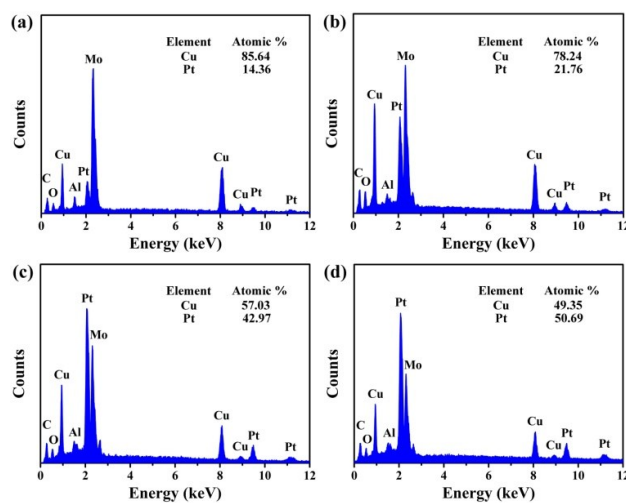

**Fig. S16** EDX spectra of the samples with different Cu/Pt atomic ratios of Pt-Cu/Mo<sub>2</sub>C.

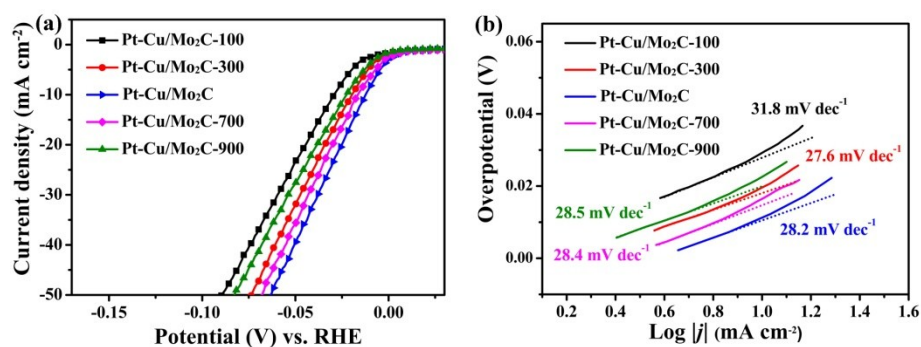

**Fig. S17** (a) Polarization curves and (b) Tafel plots of the samples with different Cu/Pt atomic ratios of Pt-Cu/Mo<sub>2</sub>C in 0.5 M H<sub>2</sub>SO<sub>4</sub>.

**Table S3** Summary of the HER activity of the as-prepared catalysts.

| Catalyst                    | Overpotential (mV) at 10<br>mA cm <sup>-2</sup> | Tafel slope<br>(mV dec <sup>-1</sup> ) |
|-----------------------------|-------------------------------------------------|----------------------------------------|
| Pt-Cu/Mo <sub>2</sub> C-100 | 29.2                                            | 31.8                                   |
| Pt-Cu/Mo <sub>2</sub> C-300 | 19.6                                            | 27.6                                   |
| Pt-Cu/Mo <sub>2</sub> C     | 12.9                                            | 28.2                                   |
| Pt-Cu/Mo <sub>2</sub> C-700 | 16.3                                            | 28.4                                   |
| Pt-Cu/Mo <sub>2</sub> C-900 | 22.9                                            | 28.5                                   |

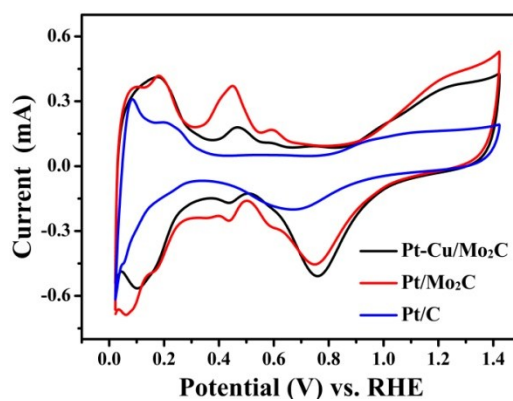

**Fig. S18** CV curves of Pt-Cu/Mo<sub>2</sub>C, Pt/Mo<sub>2</sub>C, and Pt/C tested in N<sub>2</sub>-saturated 0.5 M H<sub>2</sub>SO<sub>4</sub> solution with a scan rate of 50 mV s<sup>-1</sup>.

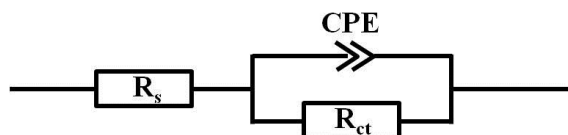

**Fig. S19** Equivalent circuit used to fit the EIS data.  $R_s$  represents the overall series resistance, CPE denotes the constant phase angle element, and  $R_{ct}$  is the charge transfer resistance.

**Table S4**  $R_{ct}$  values of the as-prepared samples.

| Catalyst                          | $R_{ct} (\Omega)$ |
|-----------------------------------|-------------------|
| $\text{Mo}_2\text{C}$             | 1.78              |
| $\text{PtCu}/\text{Mo}_2\text{C}$ | 0.58              |
| $\text{Pt}/\text{Mo}_2\text{C}$   | 0.71              |

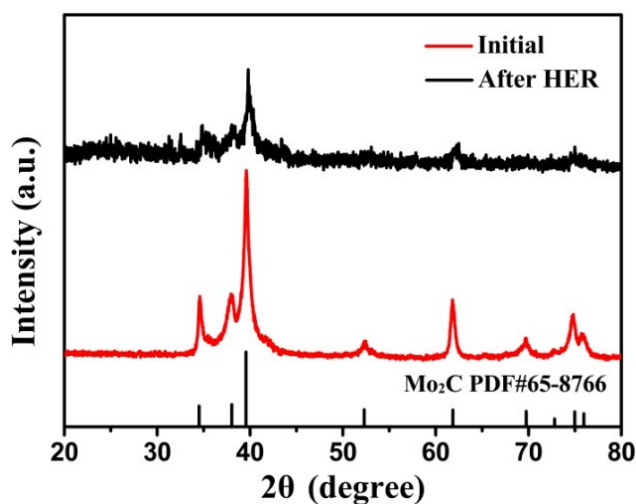

**Fig. S20** XRD patterns of  $\text{Mo}_2\text{C}$  after HER test.

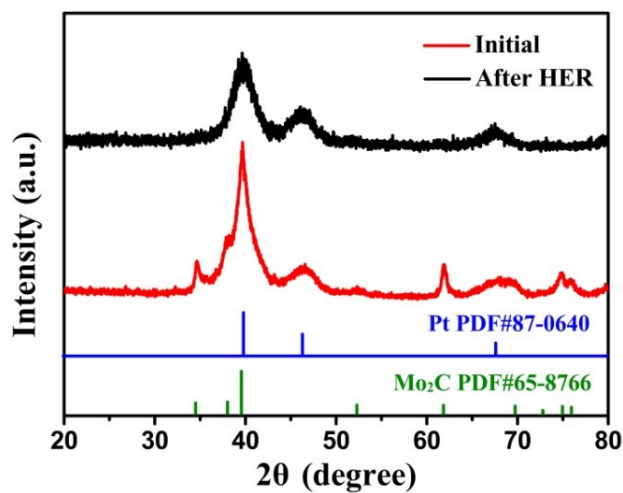

**Fig. S21** XRD patterns of  $\text{Pt}/\text{Mo}_2\text{C}$  after HER test.

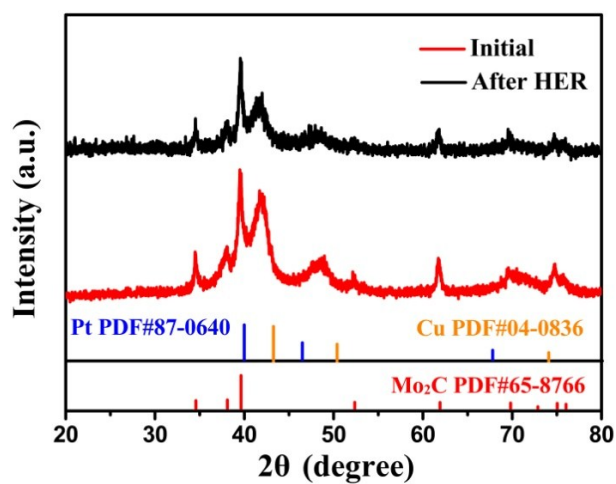

**Fig. S22** XRD patterns of Pt-Cu/Mo<sub>2</sub>C after HER test.

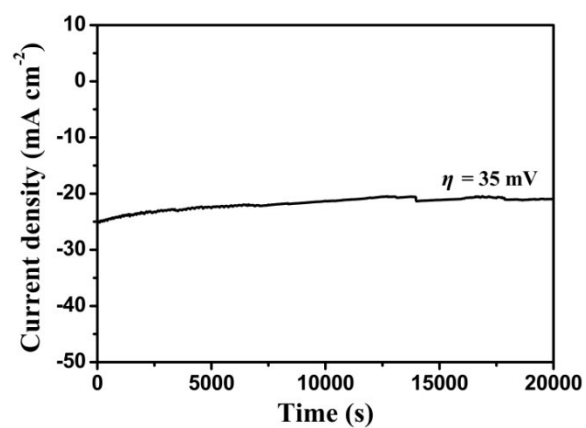

**Fig. S23** I-t curves for Pt-Cu/Mo<sub>2</sub>C at  $\eta=35$  mV.

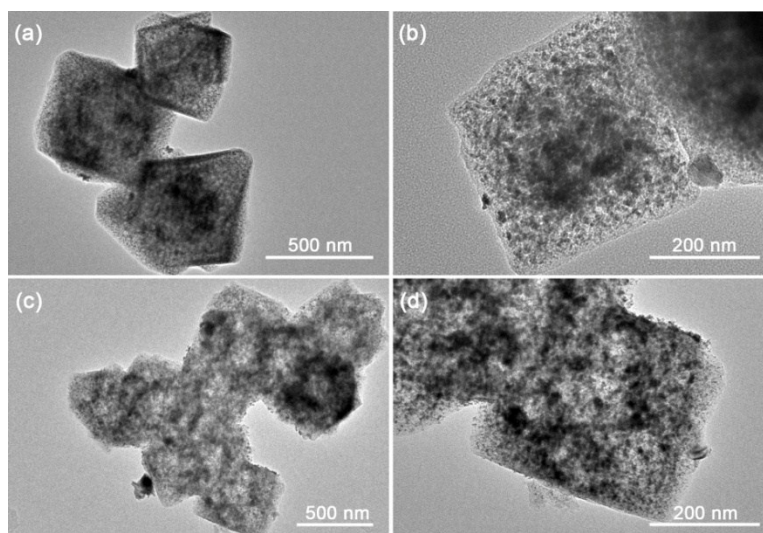

**Fig. S24** TEM images of Pt-Cu/Mo<sub>2</sub>C after i-t test. (a-b)  $\eta=13$  mV; (c-d)  $\eta=35$  mV.

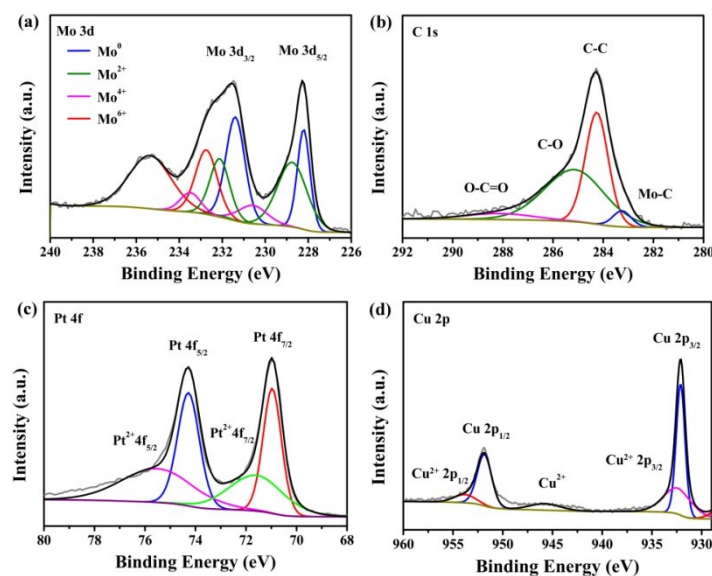

**Fig. S25** XPS spectra of Pt-Cu/Mo<sub>2</sub>C nanocomposite after HER test: (a) Mo 3d, (b) C 1s, (c) Pt 4f, and (d) Cu 2p.

**Table S5** Comparison for the as-prepared catalysts and some previously reported representative HER precious metal-based electrocatalysts in 0.5 M H<sub>2</sub>SO<sub>4</sub> solution.

| Catalyst                | Catalyst loading amount                 | Overpotential (mV) at 10 mA cm <sup>-2</sup> | Tafel slope (mV dec <sup>-1</sup> ) | Reference                                  |
|-------------------------|-----------------------------------------|----------------------------------------------|-------------------------------------|--------------------------------------------|
| Pt-Cu/Mo <sub>2</sub> C | 69.1 μg <sub>Pt</sub> cm <sup>-2</sup>  | 12.9                                         | 28.2                                | This work                                  |
| Pt/Mo <sub>2</sub> C    | 62.3 μg <sub>Pt</sub> cm <sup>-2</sup>  | 18.9                                         | 35.7                                | This work                                  |
| Pd/Cu-Pt                | 41 μg cm <sup>-2</sup>                  | 22.8                                         | 25                                  | Angew. Chem. Int. Ed., 2017, 56, 16047     |
| PdCu@Pd NCs             | 140 μg cm <sup>-2</sup>                 | 68                                           | 35                                  | ACS Appl. Mater. Interfaces, 2017, 9, 8151 |
| NiAu/Au core/shell NPs  | 204 μg cm <sup>-2</sup>                 | ~36                                          | 36                                  | J. Am. Chem. Soc., 2015, 137, 7365         |
| Pt NCs@CIAC-121         | --                                      | 48                                           | 58                                  | J. Am. Chem. Soc., 2016, 138, 16236        |
| RuP <sub>2</sub> @NPC   | 230.7 μg <sub>Ru</sub> cm <sup>-2</sup> | 38                                           | 38                                  | Angew. Chem. Int. Ed., 2017, 56, 11559     |
| ALD50Pt/NGNs            | 76.5 μg cm <sup>-2</sup>                | 40                                           | 29                                  | Nat. Commun., 2016, 7, 13638               |
| Pd@PdPt                 | 121.7 μg <sub>Pt</sub> cm <sup>-2</sup> | 39                                           | 38                                  | J. Mater. Chem.                            |

|                        |                                               |           |    |                                                   |
|------------------------|-----------------------------------------------|-----------|----|---------------------------------------------------|
| 400-SWNT/Pt            | $\sim 190 \mu\text{g cm}^{-2}$                | 27        | 38 | A, 2016, 4, 16690<br>ACS Catal., 2017,<br>7, 3121 |
| Pt-MoS <sub>2</sub>    | $75 \mu\text{g cm}^{-2}$                      | 53        | 40 | Nat. Commun.,<br>2013, 4, 1444                    |
| PtCoFe@CN              | $13.1 \mu\text{g}_{\text{Pt}} \text{cm}^{-2}$ | 45        | 32 | ACS Appl. Mater.<br>Interfaces, 2017,<br>9, 3596  |
| Ru@C <sub>2</sub> N    | $81.8 \mu\text{g}_{\text{Ru}} \text{cm}^{-2}$ | 22        | 30 | Nat. Nanotechnol.,<br>2017, 12, 441               |
| Pt ML/Au NF/Ni<br>foam | --                                            | $\sim 68$ | 53 | Sci. Adv., 2015, 1,<br>e1400268                   |
| Ru-MoO <sub>2</sub>    | $84.4 \mu\text{g}_{\text{Ru}} \text{cm}^{-2}$ | 55        | 44 | J. Mater. Chem.<br>A, 2017, 5, 5475               |
